# Supplementary material
Source: publisher figshare collection journal article supplement (https://acs.figshare.com/ndownloader/files/3993736)
Supplement: Supplementary file 1 [file 3993736]

SUPPORTING INFORMATION of the article

“Adsorption of hydrophobically end-capped poly(ethylene glycol) on  
cellulose”

*Susanna Holappa<sup>a</sup>, Katri S. Kontturi<sup>a,\*</sup>, Arto Salminen<sup>b</sup>, Jukka Seppälä<sup>b</sup>, Janne Laine<sup>a</sup>*

\*Corresponding author, e-mail: Katri.Kontturi@aalto.fi.

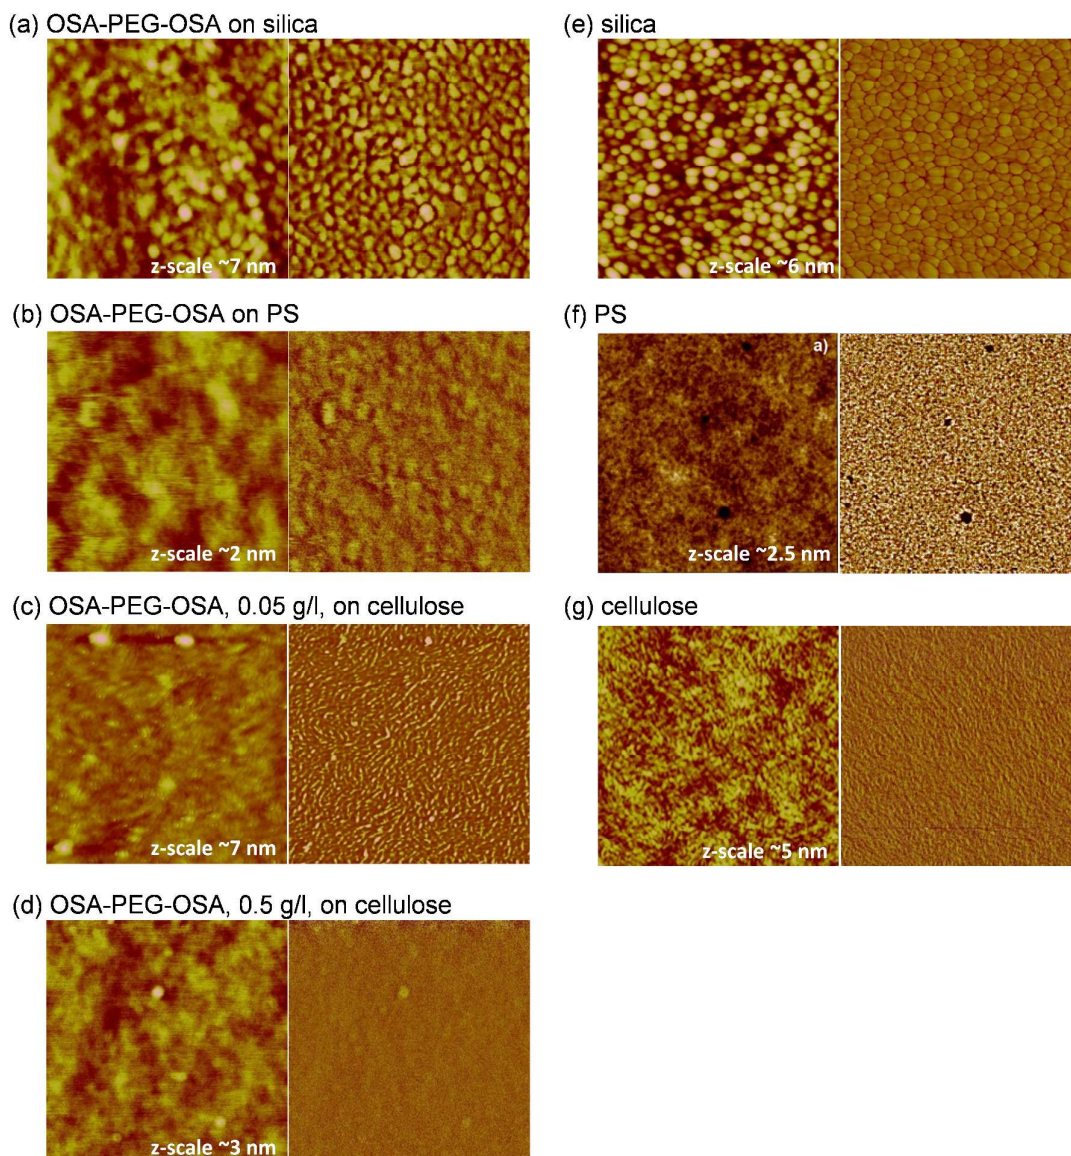

Figure S1.  $1 \times 1 \mu\text{m}^2$  AFM height images (the left side images) and phase contrast images (the right side images) of dried polymer films adsorbed from 0.05 g/l OSA-PEG-OSA solution on (a) silica, (b) PS, and (c) cellulose, and (d) from 0.5 g/l solution on cellulose. The right column presents the unmodified surfaces of (e) silica, (f) PS, and (g) cellulose.

Due to the grainy surface morphology of the silica substrate (Figure S1 e), it is very difficult to comment the presence of polymeric structures on the surface. It seems, however, that OSA-PEG-OSA has adsorbed on each substrate and from both polymer concentrations without any specific structure.
